# Supplementary material
Source: MDPI journal article supplement (https://www.mdpi.com/1996-1073/14/13/3844)
Supplement: s1 [file s1]

## Article

# Carbon Footprint for Mercury Capture from Coal-Fired Boiler Flue Gas

Magdalena Gazda-Grzywacz <sup>1,\*</sup>, Łukasz Winconek <sup>2</sup> and Piotr Burmistrz <sup>1</sup>

<sup>1</sup> Faculty of Energy & Fuels, AGH University of Science and Technology, Mickiewicz Avenue 30, 30-059 Krakow, Poland; burmistrz@agh.edu.pl

<sup>2</sup> Grand Activated Sp. z o.o., Białostocka 1, 17-200 Hajnówka, Poland; winluk1@gmail.com

\* Correspondence: magdago@agh.edu.pl

## Figure of contents:

Table S1: Structure of the mine's thermal and electric energy consumption as well as the CHP operation emission factors.

Table S2: Structure of electricity consumption by the PAC plant.

Table S3: Composition of the pyrolytic gas emitted by the PAC plant.

Table S4: Structure of demand for energy media in the coking plant.

Table S5: Characteristics of PAC and CD sorbents.

**Table S1.** Structure of the mine's thermal and electric energy consumption as well as the CHP operation emission factors.

| Parameter                                                                           | Unit                                      | Amount     |
|-------------------------------------------------------------------------------------|-------------------------------------------|------------|
|  |                                           |            |
| Coal production (mining)                                                            | Mg                                        | 14,768,400 |
| Electricity consumption                                                             | MWh                                       | 1,004,481  |
| Heat consumption (total)                                                            | GJ                                        | 649,601    |
| HC—heat consumption index                                                           | MJ·Mg <sup>-1</sup>                       | 43.985     |
| EC—electricity consumption index                                                    | kWh·Mg <sup>-1</sup>                      | 68.015     |
| Emissions from the combustion of methane by a CHP plant                             | kg CO <sub>2</sub> ·Mg <sup>-1</sup> coal | 20.602     |
| Electricity from the combustion of methane                                          | kWh·Mg <sup>-1</sup> coal                 | 28.431     |
| Heat from the combustion of methane                                                 | GJ·Mg <sup>-1</sup> coal                  | 0.070      |
| Emissions from GJ heat production by a CHP plant                                    | kg CO <sub>2</sub> ·GJ <sup>-1</sup>      | 63.460     |
| Emissions from 1 kWh production in Poland                                           | kg CO <sub>2</sub> ·kWh <sup>-1</sup>     | 0.912      |

**Table S2.** Structure of electricity consumption by the PAC plant.

| Production Stage/Raw Material       | Electricity Consumption, kWh Mg <sup>-1</sup> |        |
|-------------------------------------|-----------------------------------------------|--------|
|                                     | coal                                          | PAC    |
| Raw material analysis               | 0.28                                          | 0.1    |
| Preparation of raw materials        | 3920.0                                        | 1400   |
| Carbonization                       | 3360                                          | 1200   |
| Activation (steam generation, etc.) | 1064                                          | 380    |
| Sorting                             | 112                                           | 40     |
| Total                               | 8456.28                                       | 3020.6 |

**Table S3.** Composition of the pyrolytic gas emitted by the PAC plant.

| Component | Unit | Share |
|-----------|------|-------|
|-----------|------|-------|

|                               |                                      |       |
|-------------------------------|--------------------------------------|-------|
| H <sub>2</sub>                |                                      | 46.89 |
| CO <sub>2</sub>               |                                      | 8.17  |
| O <sub>2</sub>                |                                      | 0.44  |
| N <sub>2</sub>                |                                      | 7.86  |
| CH <sub>4</sub>               | vol. %                               | 28.26 |
| CO                            |                                      | 5.61  |
| C <sub>2</sub> H <sub>6</sub> |                                      | 0.78  |
| C <sub>2</sub> H <sub>4</sub> |                                      | 1.84  |
| C <sub>3</sub> H <sub>8</sub> |                                      | 0.03  |
| C <sub>3</sub> H <sub>6</sub> |                                      | 0.12  |
| Pyrolytic gas amount          | m <sup>3</sup> ·Mg <sup>-1</sup> PAC | 456.9 |

Table S4. Structure of demand for energy media in the coking plant.

| Index                         | Amount                               |                                      |                                     |                                     |
|-------------------------------|--------------------------------------|--------------------------------------|-------------------------------------|-------------------------------------|
|                               | kWh·Mg <sup>-1</sup> <sub>coal</sub> | kWh·Mg <sup>-1</sup> <sub>coke</sub> | GJ·Mg <sup>-1</sup> <sub>coal</sub> | GJ·Mg <sup>-1</sup> <sub>coke</sub> |
| Electricity demand            | 68.000                               | 91.520                               | -                                   | -                                   |
| Own production of electricity | 36.380                               | 48.960                               | -                                   | -                                   |
| Electricity purchase          | 31.620                               | 42.560                               | -                                   | -                                   |
| Heat demand                   | -                                    | -                                    | 1.487                               | 2.000                               |
| Own production of heat        | -                                    | -                                    | 1.212                               | 1.630                               |
| Heat purchase                 | -                                    | -                                    | 0.275                               | 0.370                               |
| Coke oven gas consumption     | -                                    | -                                    | 3.555                               | 4.785                               |

Table S5. Characteristics of PAC and CD sorbents.

| Parameter                                    | unit                            | PAC   | CD   |
|----------------------------------------------|---------------------------------|-------|------|
| M                                            |                                 | 6.5   | 0.5  |
| A                                            |                                 | 6.4   | 16.2 |
| C                                            | %                               | 84.2  | 82.7 |
| H                                            |                                 | 1.03  | 0.23 |
| S                                            |                                 | 0.10  | 0.80 |
| Density                                      | g·cm <sup>-3</sup>              | 1.80  | 1.92 |
| Mesophoric surface area                      | m <sup>2</sup> ·g <sup>-1</sup> | 50.14 | 17.2 |
| Specific surface area <i>S<sub>BET</sub></i> | m <sup>2</sup> ·g <sup>-1</sup> | 1100  | 35.2 |
